# Supplementary figures and images for: Metformin Synergizes with BCL-XL/BCL-2 Inhibitor ABT-263 to Induce Apoptosis Specifically in p53-Defective Cancer Cells
Source: Oxford University Press journal article supplement (doi:10.1158/1535-7163.mct-16-0763), 2017-05-22

# Supplementary Figure S2

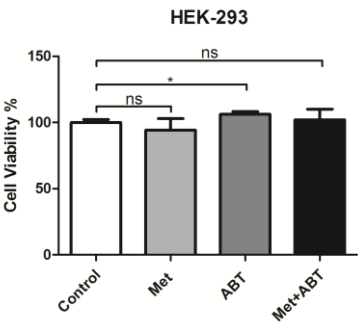

Supplement: 15357163mct160763-sup-174462_2_unknown_upload_4032995_jpjkjj.pdf [file 15357163mct160763-sup-174462_2_unknown_upload_4032995_jpjkjj.pdf]

# Supplementary Figure S7

A

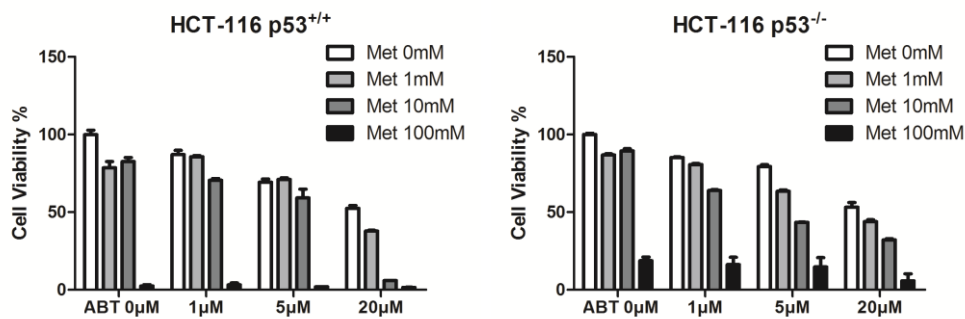

B

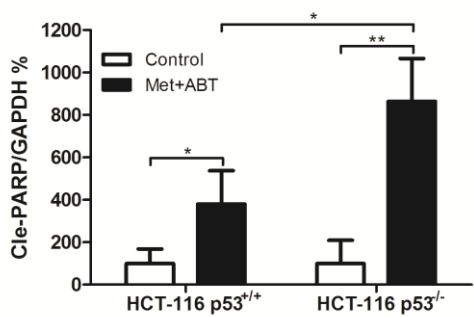

Supplement: 15357163mct160763-sup-174462_2_unknown_upload_4033000_ypsyyx.pdf [file 15357163mct160763-sup-174462_2_unknown_upload_4033000_ypsyyx.pdf]
